# Supplementary material for: Spanish Adaptation and Validation of the Transplant Effects Questionnaire (TxEQ-Spanish) in Liver Transplant Recipients and Its Relationship to Posttraumatic Growth and Quality of Life
Source: PubMed Central journal article supplement (PMC5915644; doi:10.3389/fpsyt.2018.00148), 2018-04-18
Supplement: DataSheet1.pdf [file DataSheet1.pdf]

### Appendix 1. Cuestionario Efectos del Trasplante (TxEQ-Spanish).

Estamos interesados en conocer su **punto de vista actual** de cómo vive su experiencia con el trasplante de **hígado**. Hay manifestaciones que otras personas han hecho sobre su experiencia con el trasplante. Por favor, indique en qué medida está o no de acuerdo con estas manifestaciones poniendo una **X** en el cuadro correspondiente. Gracias.

|                                                                                                  | Totalmente de acuerdo | De acuerdo | Ni de acuerdo ni en desacuerdo | En desacuerdo | Totalmente en desacuerdo |
|--------------------------------------------------------------------------------------------------|-----------------------|------------|--------------------------------|---------------|--------------------------|
| 1. En cuanto a mi trasplante, siento que llevo algo frágil dentro de mí.                         |                       |            |                                |               |                          |
| 2. A veces creo que no necesito mi medicación anti-rechazo.                                      |                       |            |                                |               |                          |
| 3. Me da miedo practicar algunas actividades porque tengo miedo de dañar mi trasplante.          |                       |            |                                |               |                          |
| 4. Creo que tengo una responsabilidad hacia el equipo de trasplante de hacerlo bien.             |                       |            |                                |               |                          |
| 5. Estoy incómodo con que otras personas sepan que tengo un trasplante.                          |                       |            |                                |               |                          |
| 6. Siento que debo algo al donante o a la familia del donante que nunca seré capaz de pagar.     |                       |            |                                |               |                          |
| 7. A veces olvido tomar mi medicación anti-rechazo.                                              |                       |            |                                |               |                          |
| 8. Estoy preocupado por dañar mi trasplante.                                                     |                       |            |                                |               |                          |
| 9. Creo que tengo una responsabilidad hacia el donante o la familia del donante de hacerlo bien. |                       |            |                                |               |                          |
| 10. Encuentro difícil adaptarme al tratamiento médico anti-rechazo prescrito.                    |                       |            |                                |               |                          |
| 11. Vigilo mi cuerpo más de cerca que antes de ser trasplantado.                                 |                       |            |                                |               |                          |
| 12. Tengo dificultades en hablar sobre mi trasplante.                                            |                       |            |                                |               |                          |
| 13. Me siento culpable de haberme beneficiado del donante.                                       |                       |            |                                |               |                          |
| 14. Evito decirle a otras personas que tengo un trasplante.                                      |                       |            |                                |               |                          |
| 15. Me preocupo cada vez que mi médico cambia mi medicación anti-rechazo.                        |                       |            |                                |               |                          |

|                                                                                                   | Totalmente de acuerdo | De acuerdo | Ni de acuerdo ni en desacuerdo | En desacuerdo | Totalmente en desacuerdo |
|---------------------------------------------------------------------------------------------------|-----------------------|------------|--------------------------------|---------------|--------------------------|
| 16. El donante tuvo que sufrir para que yo me sienta mejor.                                       |                       |            |                                |               |                          |
| 17. Sigo preguntándome cuanto tiempo funcionará mi trasplante.                                    |                       |            |                                |               |                          |
| 18. A veces pienso que he “robado” una parte vital del donante.                                   |                       |            |                                |               |                          |
| 19. Cuando estoy demasiado ocupado puedo olvidar mi medicación anti-rechazo.                      |                       |            |                                |               |                          |
| 20. Creo que tengo una responsabilidad hacia mis amigos y mi familia de hacerlo bien.             |                       |            |                                |               |                          |
| 21. A veces no tomo mi medicación anti-rechazo.                                                   |                       |            |                                |               |                          |
| 22. Tengo el sentimiento de que el donante o la familia del donante tiene algún control sobre mí. |                       |            |                                |               |                          |

## TxEQ-Spanish Scoring

First stage:

| Items                                            | Score of items |       |           |          |                   |
|--------------------------------------------------|----------------|-------|-----------|----------|-------------------|
|                                                  | Strongly agree | Agree | Uncertain | Disagree | Strongly disagree |
| 1, 3, 4, 6, 8, 9, 11, 13, 15, 16, 17, 18, 20, 22 | 5              | 4     | 3         | 2        | 1                 |
| 2, 5, 7, 10, 12, 14, 19, 21                      | 1              | 2     | 3         | 4        | 5                 |

Second stage: compute factors:

- Worry about transplant = Sum score of items 1, 3, 8, 11, 15, and 17 divided by 6. Higher scores show more worry.
- Guilt regarding the donor = Sum score of items 13, 16, 18, and 22 divided by 4. Higher scores show more guilt.
- Disclosure = Sum score of items 5, 12, and 14, divided by 3. Higher scores show more disclosure.
- Adherence = Sum score of items 2, 7, 10, 19, and 21, divided by 5. Higher scores show more adherence.
- Responsibility = Sum score of items 4, 6, 9, and 20, divided by 4. Higher scores show more responsibility.
