# Supplementary material for: Spanish Adaptation and Validation of the Transplant Effects Questionnaire (TxEQ-Spanish) in Liver Transplant Recipients and Its Relationship to Posttraumatic Growth and Quality of Life
Source: PubMed Central journal article supplement (PMC5915644; doi:10.3389/fpsyt.2018.00148), 2018-04-18
Supplement: DataSheet2.pdf [file DataSheet2.pdf]

## Appendix 2. Comparison of TxEQ-Spanish and TxEQ-English on an item to item basis.

|     | Spanish version                                                                              | English version                                                                                  |
|-----|----------------------------------------------------------------------------------------------|--------------------------------------------------------------------------------------------------|
| 1.  | En cuanto a mi trasplante, siento que llevo algo frágil dentro de mí                         | With regard to my transplant I feel that I am carrying around something fragile                  |
| 2.  | A veces creo que no necesito mi medicación anti-rechazo                                      | Sometimes I think I do not need my anti-rejection medicines                                      |
| 3.  | Me da miedo practicar algunas actividades porque tengo miedo de dañar mi trasplante          | I am hesitant to engage in certain activities because I am afraid of doing harm to my transplant |
| 4.  | Creo que tengo una responsabilidad hacia el equipo de trasplante de hacerlo bien             | I think that I have a responsibility to the transplant team to do well                           |
| 5.  | Estoy incómodo con que otras personas sepan que tengo un trasplante                          | I am uncomfortable with other people knowing that I have a transplant                            |
| 6.  | Siento que debo algo al donante o a la familia del donante que nunca seré capaz de pagar     | I feel that I owe the donor/the donor's family something that I will never be able to repay      |
| 7.  | A veces olvido tomar mi medicación anti-rechazo                                              | Sometimes I forget to take my anti-rejection medicines                                           |
| 8.  | Estoy preocupado por dañar mi trasplante                                                     | I am worried about damaging my transplant                                                        |
| 9.  | Creo que tengo una responsabilidad hacia el donante o la familia del donante de hacerlo bien | I think that I have a responsibility to the donor/the donors' family to do well                  |
| 10. | Encuentro difícil adaptarme al tratamiento médico anti-rechazo prescrito                     | I find it difficult to adjust to taking my prescribed anti-rejection drug regime                 |
| 11. | Vigilo mi cuerpo más de cerca que antes de ser trasplantado                                  | I monitor my body more closely than before I had the transplant                                  |
| 12. | Tengo dificultades en hablar sobre mi trasplante                                             | I have difficulty in talking about my transplant                                                 |
| 13. | Me siento culpable de haberme beneficiado del donante                                        | I feel guilty about having taken advantage of the donor                                          |
| 14. | Evito decirle a otras personas que tengo un trasplante                                       | I avoid telling other people that I have a transplant                                            |
| 15. | Me preocupo cada vez que mi médico cambia mi medicación anti-rechazo                         | I worry each time my anti-rejection drug regime is altered by my doctor                          |
| 16. | El donante tuvo que sufrir para que yo me sienta mejor                                       | The donor had to suffer to make me feel better                                                   |
| 17. | Sigo preguntándome cuanto tiempo funcionará mi trasplante                                    | I keep wondering how long my transplant will work                                                |
| 18. | A veces pienso que he "robado" una parte vital del donante                                   | Sometimes I think that I have 'robbed' the donor of a vital part                                 |
| 19. | Cuando estoy demasiado ocupado puedo olvidar mi medicación anti-rechazo                      | When I am too busy I may forget my anti-rejection medicines                                      |
| 20. | Creo que tengo una responsabilidad hacia mis amigos y mi familia de hacerlo bien             | I think that I have a responsibility to my friends and my family to do well                      |
| 21. | A veces no tomo mi medicación anti-rechazo                                                   | Sometimes I do not take my anti-rejection medicines                                              |
| 22. | Tengo el sentimiento de que el donante o la familia del donante tiene algún control sobre mí | I have the feeling that the donor/the donors' family has some control over me                    |
